# Supplementary material
Source: publisher figshare collection journal article supplement (https://tandf.figshare.com/articles/dataset/_/5777796)

(A)

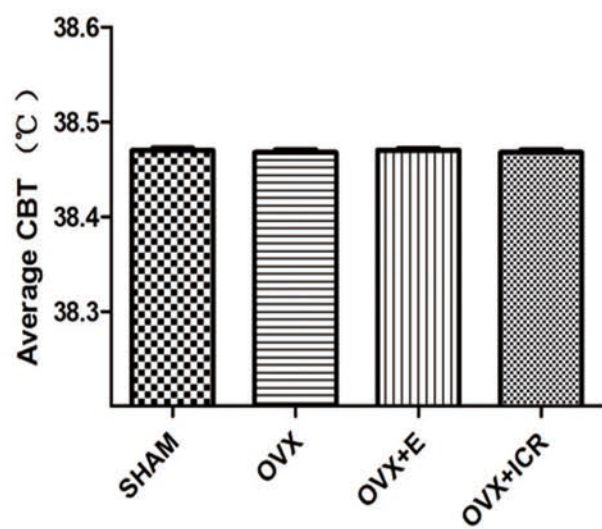

(B)

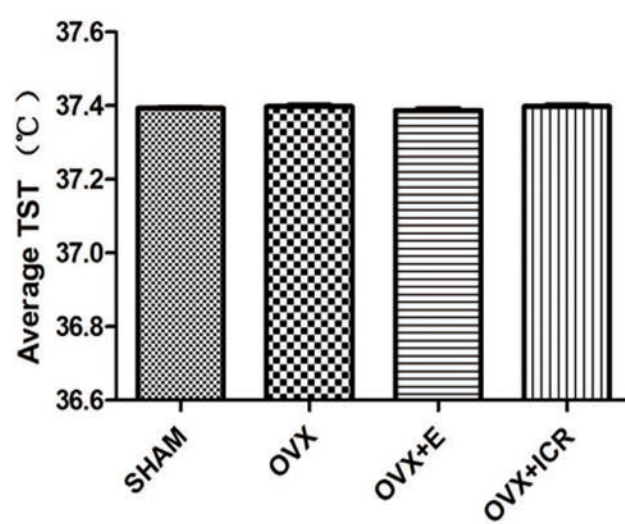

Supplementary Figure 2

Supplement: Supplementary file 1 [file 1]

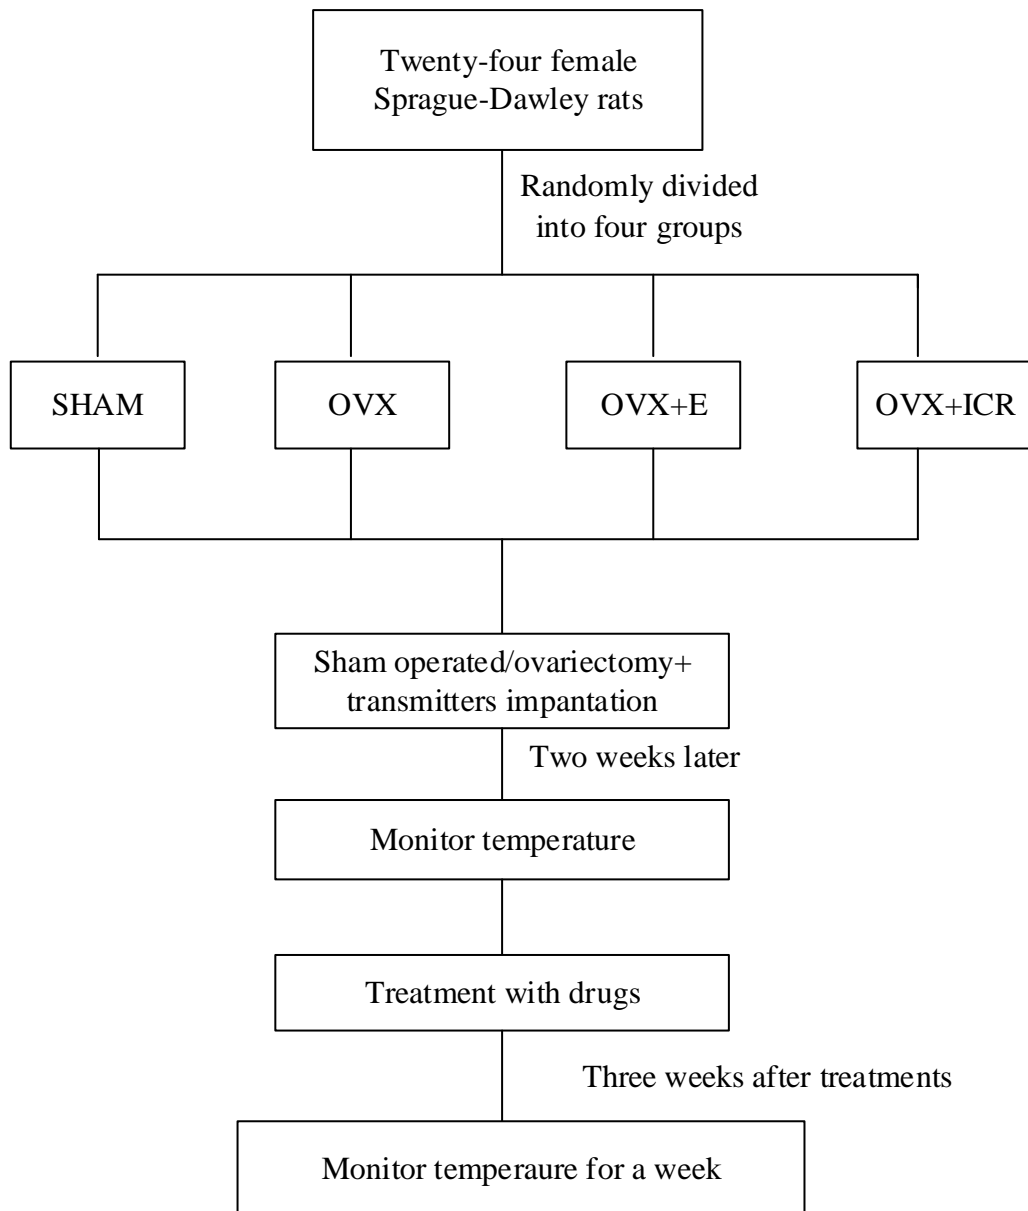

**Supplementary Figure 1**

Supplement: Supplementary file 2 [file 1]
